# Supplementary material for: The spatio-temporal evolution of multiple myeloma from baseline to relapse-refractory states
Source: PubMed Central journal article supplement (PMC9349320; doi:10.1038/s41467-022-32145-y), 2022-08-03
Supplement: 41467_2022_32145_MOESM3_ESM.pdf [file 41467_2022_32145_MOESM3_ESM.pdf]

## Description of Additional Supplementary Files

Supplementary Data 1: Treatment and samples
